# Supplementary material for: Effects of a Plant-Based High-Carbohydrate/High-Fiber Diet Versus High–Monounsaturated Fat/Low-Carbohydrate Diet on Postprandial Lipids in Type 2 Diabetic Patients
Source: PubMed Central journal article supplement — Diabetes Care. 2009 Sep 9;32(12):2168–73. doi: 10.2337/dc09-0266 (PMC2782970; doi:10.2337/dc09-0266), 2009-09-09
Supplement: supp_dc09-0266_dc09-0266_Online_appendix.pdf [file supp_dc09-0266_dc09-0266_Online_appendix.pdf]

**Table A1. Weekly meal schedule utilized during the High CHO-high fibre dietary period (2000 kcal/day)**

|                                                              | MONDAY                                                                                                                                                                      | TUESDAY                                                                                                                                                                                      | WEDNESDAY                                                                                                                                   | THURSDAY                                                                                                                                                                                         | FRIDAY                                                                                                                                                                                                           | SATURDAY                                                                                                                                                                                                              | SUNDAY                                                                                                                                                                                           |
|--------------------------------------------------------------|-----------------------------------------------------------------------------------------------------------------------------------------------------------------------------|----------------------------------------------------------------------------------------------------------------------------------------------------------------------------------------------|---------------------------------------------------------------------------------------------------------------------------------------------|--------------------------------------------------------------------------------------------------------------------------------------------------------------------------------------------------|------------------------------------------------------------------------------------------------------------------------------------------------------------------------------------------------------------------|-----------------------------------------------------------------------------------------------------------------------------------------------------------------------------------------------------------------------|--------------------------------------------------------------------------------------------------------------------------------------------------------------------------------------------------|
| BREAKFAST                                                    | Coffee, tea or barley drink without sugar or with sweetener + low fat (0.1%) yogurt (125g) + ALL BRAN sticks (40g)                                                          |                                                                                                                                                                                              |                                                                                                                                             |                                                                                                                                                                                                  |                                                                                                                                                                                                                  |                                                                                                                                                                                                                       |                                                                                                                                                                                                  |
| LUNCH                                                        | <ul style="list-style-type: none"> <li>•Pasta ( 90g) with dry beans (70g)</li> <li>•Beet (300g)</li> <li>•Orange (150g)</li> </ul>                                          | <ul style="list-style-type: none"> <li>•Dry Chickpeas (130g)</li> <li>•Broccoli (sprouts) (300g)</li> <li>•Apple (200g)</li> </ul>                                                           | <ul style="list-style-type: none"> <li>• Pasta (90g) with dry lentils (60g)</li> <li>•Spinach (300g)</li> <li>•Orange (150g)</li> </ul>     | <ul style="list-style-type: none"> <li>•Pasta (120g) with peeled tomatoes (100g) and French beans (300g)</li> <li>•Fennels (300g)</li> <li>•Orange (100g)</li> </ul>                             | <ul style="list-style-type: none"> <li>•Pasta (90g) with dry chickpeas (80g)</li> <li>•Beet (250g)</li> <li>•Orange (150g)</li> </ul>                                                                            | <ul style="list-style-type: none"> <li>•Dry beans (130g)</li> <li>•Artichokes (200g)</li> <li>•Orange (200g)</li> </ul>                                                                                               | <ul style="list-style-type: none"> <li>•Pasta (120g) with peeled tomatoes (100g) and French beans (300g)</li> <li>•Fennels (300g)</li> <li>•Orange (100g)</li> </ul>                             |
| DINNER                                                       | <ul style="list-style-type: none"> <li>•Parboiled rice (90g) with frozen peas (70g)</li> <li>•Pork chop (140g)</li> <li>•Artichokes (200g)</li> <li>•Pear (150g)</li> </ul> | <ul style="list-style-type: none"> <li>•Pasta (130g) with peeled tomatoes (200g) and parmesan cheese (18g)</li> <li>•Lean ham (50g)</li> <li>•Fennel (300g)</li> <li>•Pear (150g)</li> </ul> | <ul style="list-style-type: none"> <li>•Parboiled rice (90g) with artichokes (300g)</li> <li>•Tuna (120g)</li> <li>•Apple (150g)</li> </ul> | <ul style="list-style-type: none"> <li>•Pasta (100g) with frozen peas (60g)</li> <li>•Lean ham (80g)</li> <li>•Emmental cheese (50g)</li> <li>•Chicory (300g)</li> <li>•Orange (100g)</li> </ul> | <ul style="list-style-type: none"> <li>• Parboiled rice (90g) with broccoli (sprouts) (300g)</li> <li>•Chicken leg (80g)</li> <li>•Spinach (250g)</li> <li>•Sliced cheese (30g)</li> <li>•Pear (150g)</li> </ul> | <ul style="list-style-type: none"> <li>•Pasta (130g) with peeled tomatoes (200g)</li> <li>• Eggs (2)</li> <li>•Spinach (200g) with parmesan cheese (12g)</li> <li>•Courgettes (200g)</li> <li>•Pear (150g)</li> </ul> | <ul style="list-style-type: none"> <li>•Pasta (100g) with frozen peas (60g)</li> <li>•Lean ham (80g)</li> <li>•Emmental cheese (50g)</li> <li>•Chicory (300g)</li> <li>•Orange (100g)</li> </ul> |
| Whole-meal bread 50g daily; Extra-virgin olive oil 50g daily |                                                                                                                                                                             |                                                                                                                                                                                              |                                                                                                                                             |                                                                                                                                                                                                  |                                                                                                                                                                                                                  |                                                                                                                                                                                                                       |                                                                                                                                                                                                  |

**Table A2. Weekly meal schedule utilized during the Low CHO-high MUFA dietary period (2000 kcal/day)**

|           | MONDAY                                                                                                                                   | TUESDAY                                                                                                                 | WEDNESDAY                                                                                                                                | THURSDAY                                                                                                                                                                                | FRIDAY                                                                                                                                          | SATURDAY                                                                                                                     | SUNDAY                                                                                                                                                                                      |
|-----------|------------------------------------------------------------------------------------------------------------------------------------------|-------------------------------------------------------------------------------------------------------------------------|------------------------------------------------------------------------------------------------------------------------------------------|-----------------------------------------------------------------------------------------------------------------------------------------------------------------------------------------|-------------------------------------------------------------------------------------------------------------------------------------------------|------------------------------------------------------------------------------------------------------------------------------|---------------------------------------------------------------------------------------------------------------------------------------------------------------------------------------------|
| BREAKFAST | Coffee, tea or barley drink without sugar or with sweetener + skimmed milk 1.5% (200g) + rush (30g)                                      |                                                                                                                         |                                                                                                                                          |                                                                                                                                                                                         |                                                                                                                                                 |                                                                                                                              |                                                                                                                                                                                             |
| LUNCH     | <ul style="list-style-type: none"> <li>•Potatoes (300g)</li> <li>•Tuna (52g)</li> <li>•Lettuce ( 50g)</li> <li>•Banana (100g)</li> </ul> | <ul style="list-style-type: none"> <li>•White rice (60g)</li> <li>•Pumpkin (200g)</li> <li>•Kiwi (200g )</li> </ul>     | <ul style="list-style-type: none"> <li>•Potatoes (300g)</li> <li>•Tuna (52g)</li> <li>•Lettuce ( 50g)</li> <li>•Banana (100g)</li> </ul> | <ul style="list-style-type: none"> <li>•White rice (50g) with peeled tomatoes (100g)</li> <li>•“Bresaola” beef salami (80g)</li> <li>•Carrots (150g)</li> <li>•Banana (100g)</li> </ul> | <ul style="list-style-type: none"> <li>• Pasta (30g)</li> <li>•Potatoes (200g)</li> <li>•Chicken breast (100g)</li> <li>•Orange 150g</li> </ul> | <ul style="list-style-type: none"> <li>•Pizza with tomatoes and mozzarella cheese (200g)</li> <li>•Lean ham (50g)</li> </ul> | <ul style="list-style-type: none"> <li>•Potatoes “gnocchi” (150g) with peeled tomatoes (150g)</li> <li>•Veal fillet (100g)</li> <li>•Lettuce (50g)</li> <li>•Orange juice (150g)</li> </ul> |
| DINNER    | <ul style="list-style-type: none"> <li>•Chicken breast (180g)</li> <li>•“Scarola” endive (200g)</li> <li>•Orange (250g)</li> </ul>       | <ul style="list-style-type: none"> <li>•Roasted veal (200g) with lettuce (50g)</li> <li>•Orange juice (250g)</li> </ul> | <ul style="list-style-type: none"> <li>•Chicken breast (180g)</li> <li>•“Scarola” endive (200g)</li> <li>•Orange (250g)</li> </ul>       | <ul style="list-style-type: none"> <li>•Anchovies (200g)</li> <li>•Lettuce (50g)</li> <li>•Orange juice (250g)</li> </ul>                                                               | <ul style="list-style-type: none"> <li>•Codfish (180g)</li> <li>•Beet (100g)</li> <li>•Orange juice (250g)</li> </ul>                           | <ul style="list-style-type: none"> <li>•Sole (250g)</li> <li>•Banana (100g)</li> </ul>                                       | <ul style="list-style-type: none"> <li>•Lean ham (150g)</li> <li>•“Scarola” endive (150g)</li> <li>•Orange juice (250g)</li> </ul>                                                          |

White bread 120g daily; Extra-virgin olive oil 70g daily
